# Supplementary material
Source: PubMed Central journal article supplement (PMC4407851)
Supplement: supp_db14-0758_DB140758SupplementaryData.pdf [file supp_db14-0758_DB140758SupplementaryData.pdf]

SUPPLEMENTARY DATA

**Supplementary Figure 1.** Complex II (A), Complex IV (B), and citrate synthase activity (C) were measured in hippocampal lysates from db/m and db/db mice. There were no significant differences in enzymatic activity between db/db and db/m control hippocampus. NS = non-significance,  $P > 0.05$ . N = 10 animals per group.

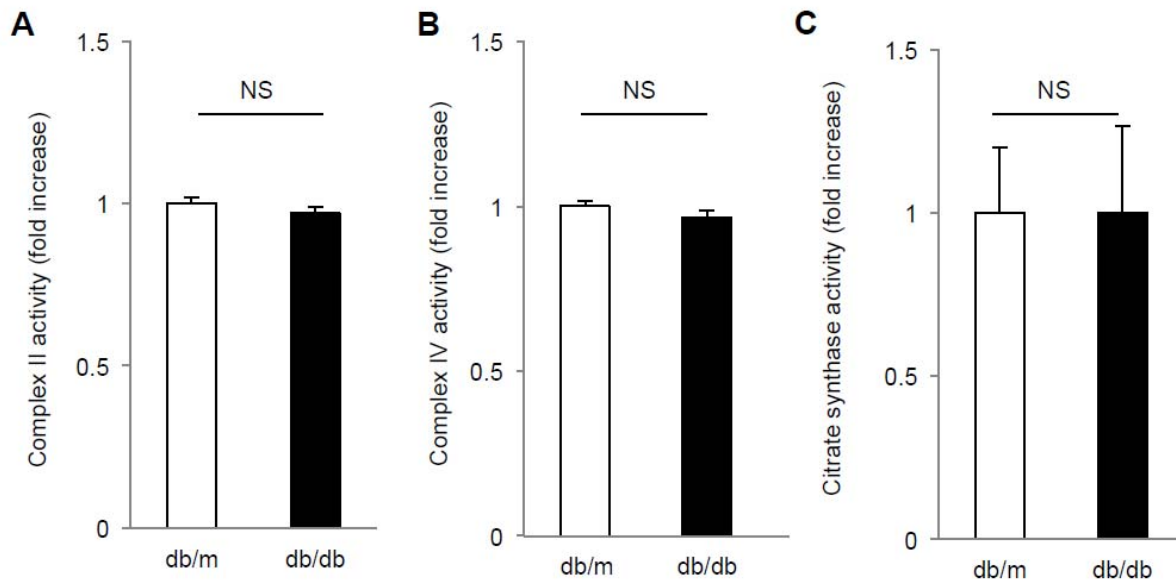

**Supplementary Figure 2.** Diabetes-induced changes in proteins associated with mitochondrial dynamics. (A) Western blots showed no significant alterations in Mfn2 and OPA1 levels in diabetes-affected hippocampus when compared to that of db/m control mice. (B) Immunostaining for Drp1 (red), MAP2 (green), and nuclei (blue) in db/m and db/db hippocampal sections. (C) Quantification of Drp1 immunofluorescence intensity in hippocampal CA1 region demonstrated an increase in Drp1 in diabetes-affected hippocampus. (D) Quantitative real-time PCR revealed increased Drp1 mRNA levels in db/db mice compared to that in db/m control mice. Scale bar = 50  $\mu$ m. N = 4-6 animals per group.

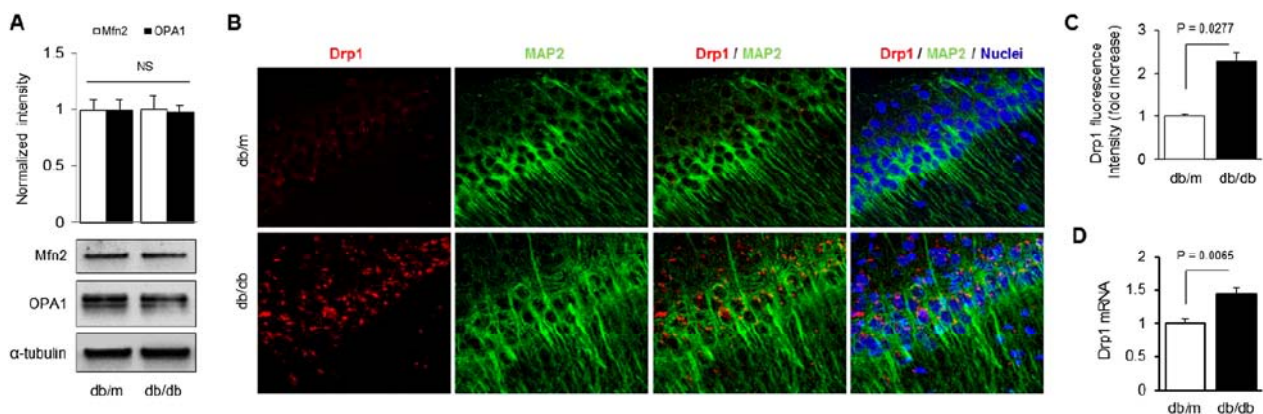

SUPPLEMENTARY DATA

**Supplementary Figure 3.** Non-metabolizable sugar L-glucose did not change mitochondrial morphology and function as well as GSK/Drp1 signaling. Effect of normal glucose (5.5 mM; control), high glucose (50 mM, H-Glu) or normal glucose (5.5 mM) plus L-glucose (same osmolality level as 50 mM glucose) exposure on mitochondrial morphology (A), length (B), density (C), and complex I activity (D) were measured on SK cells. E) Densitometry of immunoreactive bands of the indicated groups for p-Drp1, Drp1, p-GSK3 $\beta$ , and GSK3 $\beta$ . Scale bar = 10  $\mu$ m. H-Glu: high glucose. L-Glu: L-glucose. NS: non-significance. N = 4 wells from 2 independent experiments.

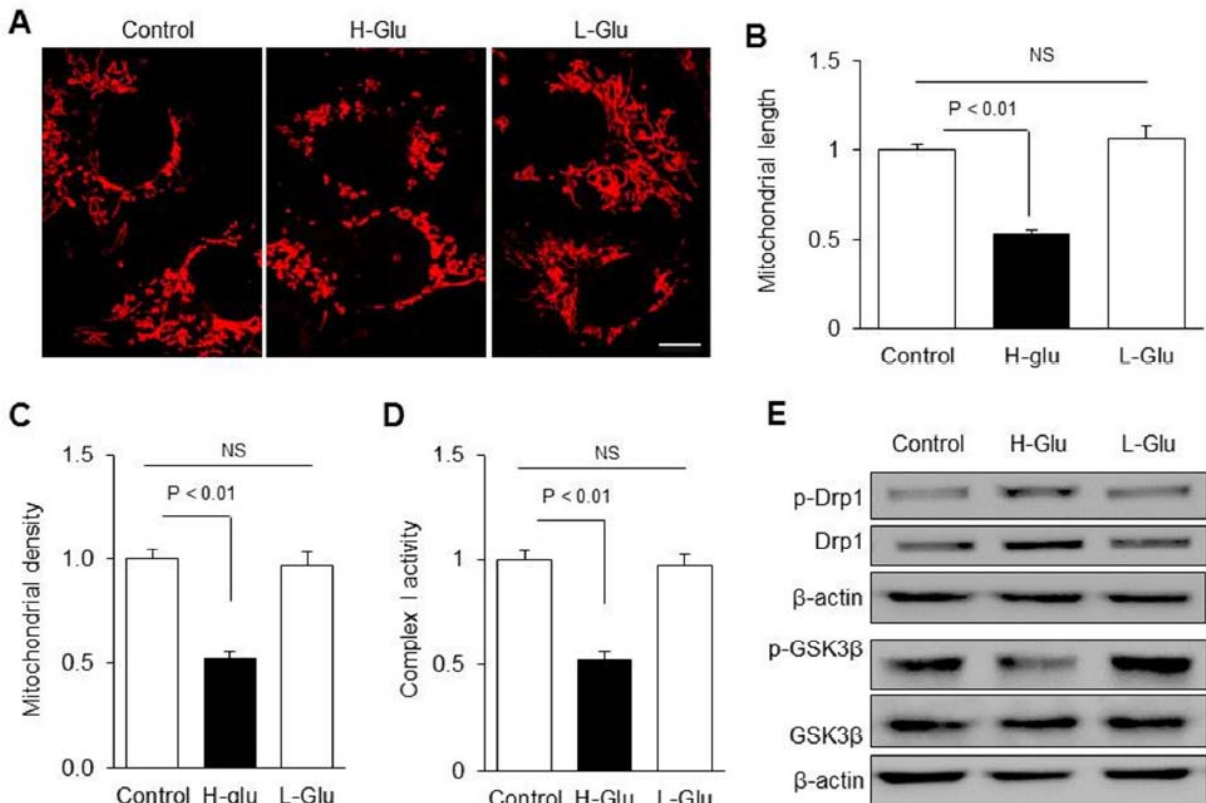

SUPPLEMENTARY DATA

**Supplementary Figure 4.** Modulations of GSK3 $\beta$ /Drp1 signaling have no significant effects on mitochondria morphology in SK cultured cells under normal glucose condition. **A-C**) Representative images (**A**) for mitotracker red staining of vector (up panel) or DN-Drp1 plasmids (bottom panel), and Measurement of mitochondrial length (**B**) and density (**C**) in the indicated groups of cells. **D-F**) Representative images for Drp1 immunostaining (left, green), mitotracker red (middle, red), and merged (right) from control siRNA (upper panel) or Drp1 siRNA (lower panel) transfected SK cells (**D**). Mitochondrial length (**E**) and density (**F**) were measured in cells transfected with the control siRNA or Drp1 siRNA. **G-I**) Treatment of TDZD8 (5  $\mu$ M for 1 h) did not affect mitochondrial morphology. Representative images of mitotracker red (**G**), Measurement of mitochondrial length (**H**) and density (**I**) are shown in the indicated groups of cells. **J-L**) Transfection with vector or DN-GSK3 $\beta$  plasmids had no effect on mitochondrial morphology. Representative images of mitotracker red (**J**), and Measurement of mitochondrial length (**K**) and density (**L**) are shown in the indicated groups of cells. Scale bar = 10  $\mu$ m. N  $\geq$  20 cells per group from 2 independent experiments. NS: non-significance.

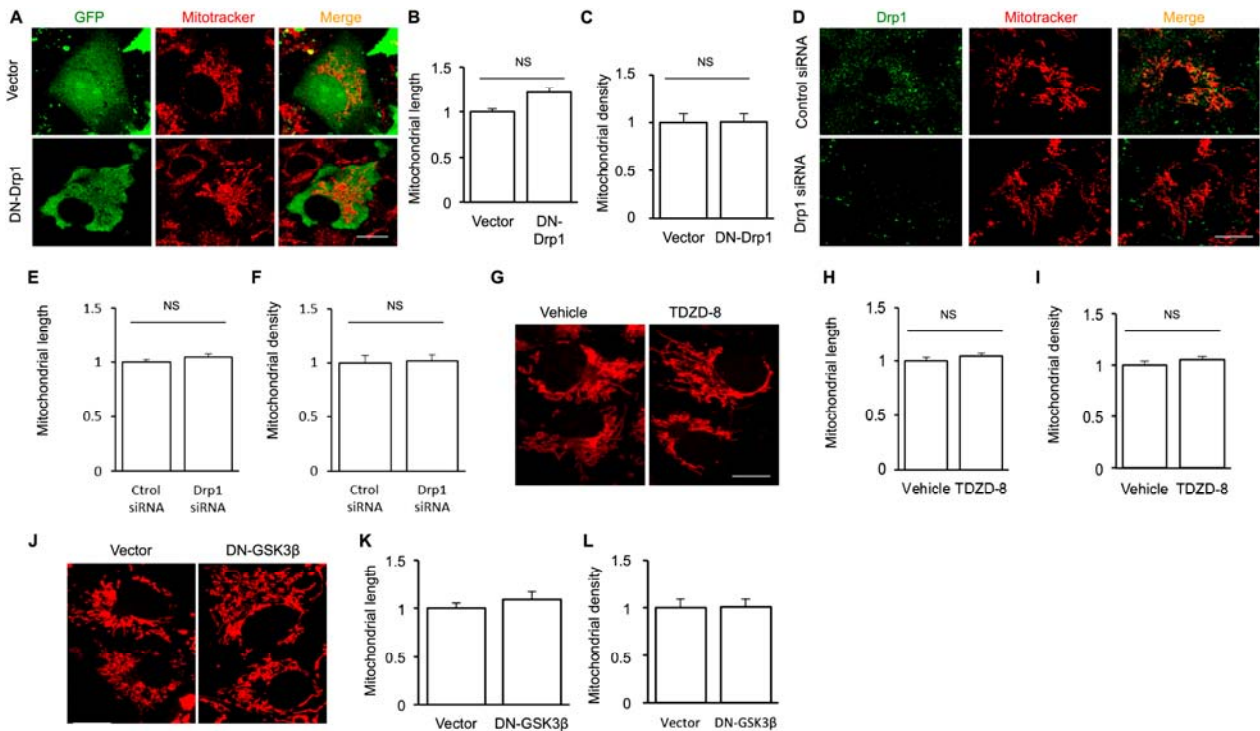

SUPPLEMENTARY DATA

**Supplementary Figure 5.** Immunoblots for GSK3 $\beta$  and phospho-GSK3 $\beta$  from *in vitro* and *in vivo* samples. **A-B)** Densitometry of immunoreactive bands for GSK3 $\beta$  and p-ser9 GSK3 $\beta$ . SK cells transfected with dominant negative Drp1 plasmid (DN-Drp1, +), vector alone (-) (A), control siRNA (-) (B), (A) or Drp1 siRNA (+) (B) had no significant effects on GSK3 $\beta$  phosphorylation/expression under diabetic condition. **C)** Immunoblots indicated that administration of mdivi-1 (+) failed to alter levels of p-ser9 GSK3 $\beta$ /GSK3 $\beta$  in hippocampus of the indicated groups of animals compared to vehicle (-) treated group. NS: non-significance. N = 6 wells from 3 independent experiments or N = 6 animals per group for immunoblots.

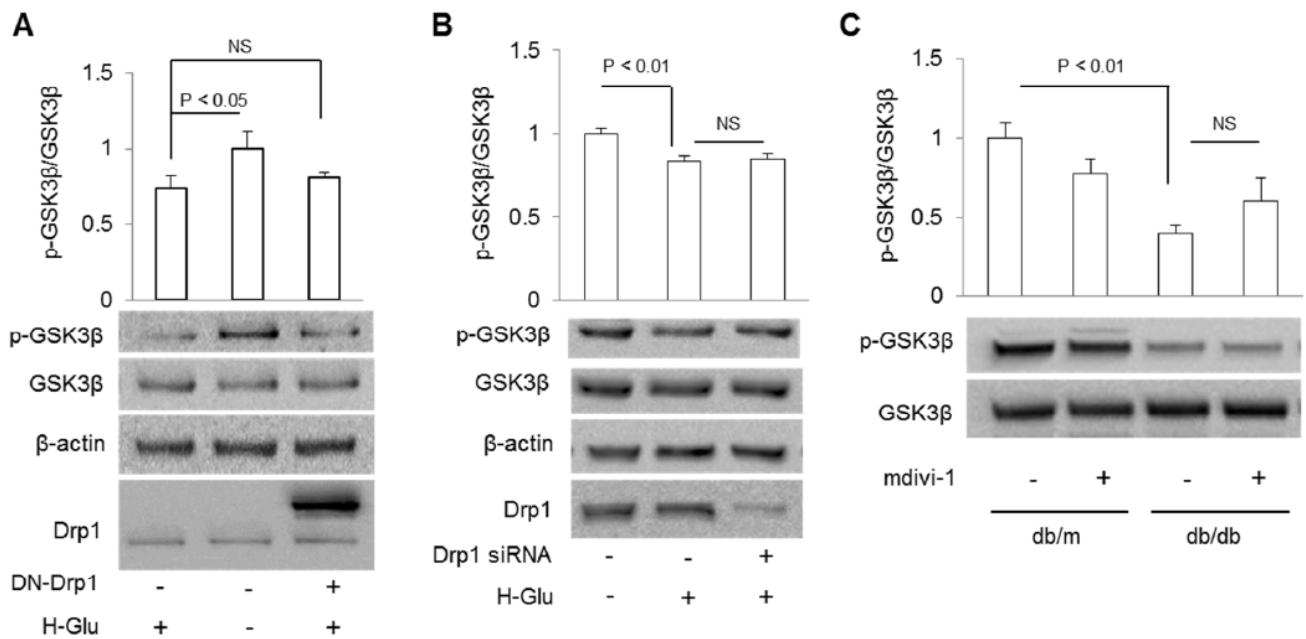

SUPPLEMENTARY DATA

**Supplementary Figure 6.** Serum insulin and corticosterone levels after mdivi-1 administration. There were significant increases of insulin (**A**) and corticosterone (**B**) within db/db serum compared to db/m controls. Treatment with Drp1 inhibitor (mdivi-1, 25 mg/kg for 2 weeks daily) did not significantly affect insulin and corticosterone concentration in serum. NS = non-significance,  $P > 0.05$ .  $N = 7-8$  animals per group. Vech: vehicle

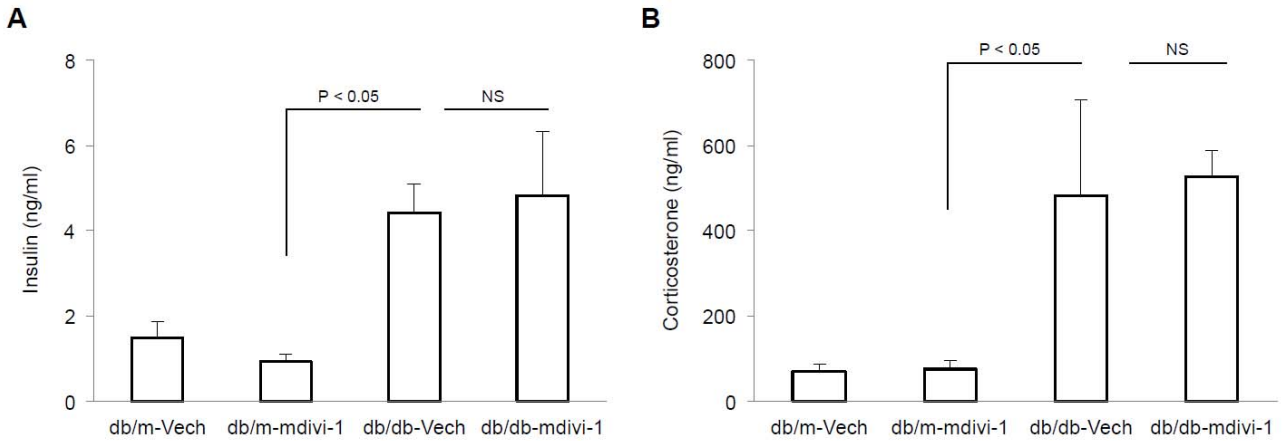

SUPPLEMENTARY DATA

**Supplementary Figure 7.** Mitochondrial defects and hippocampal LTP at 3 months and 6 months of age of diabetic mice. Complex I (A) and ATP content (B) were measured in hippocampal lysates from db/m and db/db mice at 3 months or 6 months of age. N = 6-10 animals per group. C) The basal synaptic transmission was illustrated as the indicated groups of animals. (D) Normalized slope of fEPSPs in the indicated groups of animals at 3 months of age. (E) Residual potentiation from the normalized fEPSP slopes occurring over the last 10 min of LTP recordings. N= 9-11 slices from 4 mice of each groups. NS = non-significance, P > 0.05.

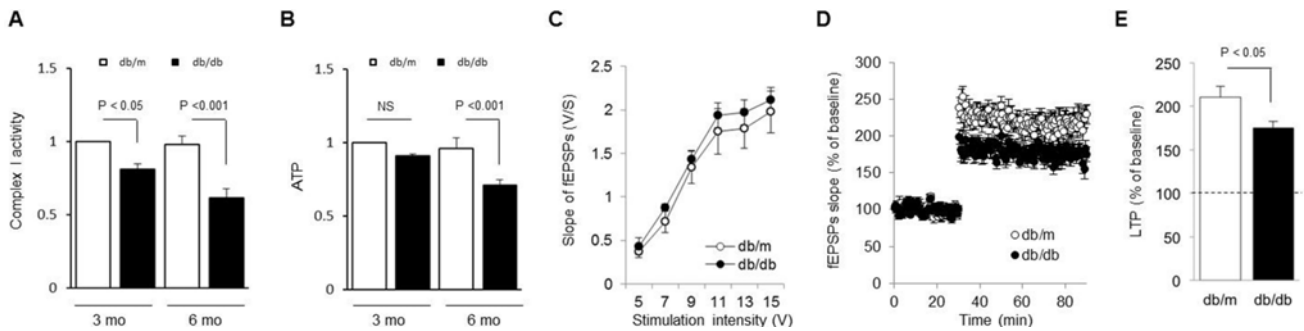

SUPPLEMENTARY DATA

**Supplementary Figure 8.** Dephosphorylation of Akt at Ser473 in diabetic conditions both *in vivo* and *in vitro*. **A-B)** Densitometry of immunoreactive phosphorylation of Akt (p-Akt) bands relative to the total Akt in diabetes-affected hippocampus (**A**) or high glucose exposed SK cultures (**B**). The lower panels of A-B are representative immunoblots for p-Akt and Akt in hippocampal tissues (**A**) or SK cells treated with vehicle (5.5 mM D-glucose + 44.5 mM L-glucose) or high glucose (50 mM for one hour, **B**). N = 6-8 animals per group or 4 wells from 2 independent experiments.

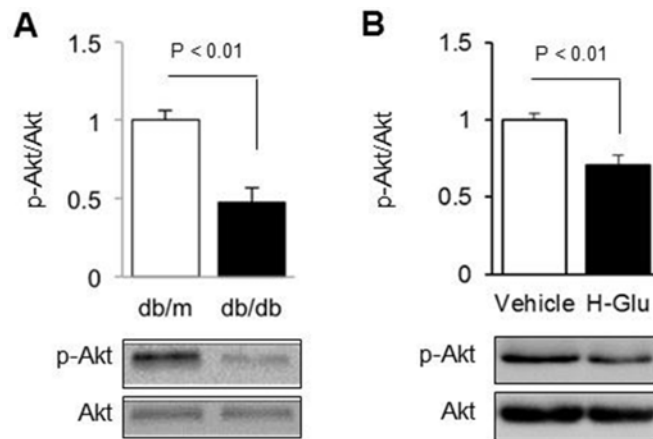

SUPPLEMENTARY DATA

**Supplementary Table 1.** Effects of Diabetes and mdivi-1 treatment on body weight and blood glucose levels.

|            | db/m-vehicle    |                       | db/m-Mdivi-1    |                       | db/db-vehicle   |                       | db/db-Mdivi-1   |                       |
|------------|-----------------|-----------------------|-----------------|-----------------------|-----------------|-----------------------|-----------------|-----------------------|
|            | Body weight (g) | Blood glucose (mg/dl) |
|            | 26.2            | 132                   | 23.5            | 135                   | 49.4            | 600                   | 54.1            | 450                   |
|            | 28.7            | 158                   | 27.9            | 150                   | 37.5            | 550                   | 43.6            | 564                   |
|            | 30.5            | 150                   | 27.3            | 112                   | 46.5            | 600                   | 50.6            | 600                   |
|            | 25.3            | 138                   | 29.2            | 172                   | 46.8            | 600                   | 39.1            | 600                   |
|            | 27.3            | 162                   | 30.9            | 158                   | 51.1            | 600                   | 42.1            | 600                   |
|            | 30.6            | 156                   | 31.5            | 158                   | 43.3            | 600                   | 47.5            | 600                   |
|            | 31.6            | 151                   | 30.9            | 189                   | 42.3            | 600                   | 46.8            | 600                   |
|            | 30.2            | 172                   | 30.5            | 190                   |                 |                       |                 |                       |
| Mean ± SEM | 28.8 ± 0.8      | 152.4 ± 4.2           | 29.0 ± 0.9      | 158 ± 8.7             | 45.3 ± 2.8 *    | 592.9 ± 6.6 #         | 46.3 ± 1.8 *    | 573.4 ± 19.6 #        |

\*  $P < 0.01$  in bodyweight (mdivi-1-treated db/m mice vs. vehicle-treated db/m mice, or mdivi-1-treated db/db mice vs. vehicle-treated db/db mice). #  $P < 0.01$  in blood glucose (mdivi-1-treated db/m mice vs. vehicle-treated db/m mice, or mdivi-1-treated db/db mice vs. vehicle-treated db/db mice). No significance in either body weight or glucose levels were detected between vehicle-treated and mdivi-1-treated db/db mice.
